# Supplementary material for: Size controlled synthesis of monodisperse PbTe quantum dots: using oleylamine as the capping ligand
Source: Royal Society of Chemistry journal article supplement (doi:10.1039/c2jm15540k), 2012-01-01
Supplement: c2jm15540k.pdf [file c2jm15540k.pdf]

## Size controlled synthesis of monodisperse PbTe quantum dots: using oleylamine as capping ligand

Yi Pan,<sup>a,b,\*</sup> Hanying Bai,<sup>c</sup> Liang Pan,<sup>a</sup> Yadi Li<sup>a,b</sup>, Maria C. Tamargo,<sup>a,b</sup> Mohammad Sohel<sup>d</sup>, and John R. Lombardi<sup>a,b</sup>

<sup>a</sup>Department of Chemistry, the City College of New York, the City University of New York (CUNY), New York, NY 10031, USA

<sup>c</sup>Columbia University, New York, NY 10027, USA

<sup>d</sup>Hostos Community College, CUNY, Bronx, NY 10451, USA

\*Correspondence to: Yi Pan, e-mail: [ypan@sci.ccnycunyu.edu](mailto:ypan@sci.ccnycunyu.edu)

**Table S1 PbTe QDs Yield Calculation\***

| Sample # | Input Mass of PbCl <sub>2</sub> (g) | Output Mass of PbTe QDs (g) | Theoretical Yield of PbTe (g) | Yield (%) based on the theoretical yield of PbTe |
|----------|-------------------------------------|-----------------------------|-------------------------------|--------------------------------------------------|
| QD-1     | 0.093                               | -                           | 0.110                         | -                                                |
| QD-2     | 0.094                               | 0.018                       | 0.110                         | 16                                               |
| QD-3     | 0.093                               | 0.057                       | 0.110                         | 52                                               |
| QD-4     | 0.095                               | 0.040                       | 0.110                         | 36                                               |
| QD-5     | 0.093                               | 0.031                       | 0.110                         | 28                                               |
| QD-6     | 0.093                               | -                           | 0.110                         | -                                                |
| QD-7     | 0.094                               | -                           | 0.110                         | -                                                |

\* The yields were calculated based on one batch of the synthesis. However, each size of the PbTe QDs was synthesized at least times.

**Table S2 EDS Results of PbTe QDs sample QD-2**

| Element | Weight % | Atomic % |
|---------|----------|----------|
| TeL     | 20.2     | 29.2     |
| PbL     | 79.8     | 70.8     |
| Total   | 100.0    | 100.0    |

**Table S3 EDS Results of PbTe QDs sample QD-3**

| Element | Weight % | Atomic % |
|---------|----------|----------|
| TeL     | 38.0     | 49.9     |
| PbL     | 62.0     | 50.1     |
| Total   | 100.0    | 100.0    |

**Table S4** EDS Results of PbTe QDs sample QD-4

| Element | Weight % | Atomic % |
|---------|----------|----------|
| TeL     | 35.0     | 46.7     |
| PbL     | 65.0     | 53.3     |
| Total   | 100.0    | 100.0    |

**Table S5** EDS Results of PbTe QDs sample QD-5

| Element | Weight % | Atomic % |
|---------|----------|----------|
| TeL     | 37.8     | 49.7     |
| PbL     | 62.2     | 50.3     |
| Total   | 100.0    | 100.0    |

**Table S6** IR Peak Assignment for TOP (purity 90%)<sup>1-3</sup>

| Wavenumber/cm <sup>-1</sup> | Assignment <sup>a</sup>                 |
|-----------------------------|-----------------------------------------|
| 2956 (2966) <sup>b</sup>    | $\nu_{\text{as}}(\text{CH}_3)$ (strong) |
| 2924 (2925)                 | $\nu_{\text{as}}(\text{CH}_2)$          |
| 2871 (2872)                 | $\nu_{\text{s}}(\text{CH}_3)$ (strong)  |
| 2852 (2855)                 | $\nu_{\text{s}}(\text{CH}_2)$           |
| 1464 (1467)                 | $\delta(\text{CH}_2)$                   |
| 722 (721)                   | $\gamma(\text{CH}_2)$                   |

<sup>a</sup> Symbols  $\nu$ ,  $\delta$ , and  $\gamma$  refer to stretching, in-plane deformation, and out-of-plane deformation, respectively.

<sup>b</sup> The numbers in bracket are from reference 1's IR database.

**Table S7** IR Peak Assignment for OLA (purity 80-90%)

| Wavenumber/cm <sup>-1</sup> | Assignment <sup>a</sup>                            |
|-----------------------------|----------------------------------------------------|
| 3004 (3005) <sup>b</sup>    | $\nu(\text{CH})$ of $-\text{CH}=\text{CH}-$        |
| 2954                        | $\nu_{\text{as}}(\text{CH}_3)$ (weak)              |
| 2924 (2924)                 | $\nu_{\text{as}}(\text{CH}_2)$                     |
| 2853 (2853)                 | $\nu_{\text{s}}(\text{CH}_2)$                      |
| 1465 (1467)                 | $\delta(\text{CH}_2)$                              |
| 1378 (1378)                 | $\delta_{\text{s}}(\text{CH}_3)$                   |
| 967 (967)                   | $\nu(\text{C}-\text{Cl})$ of $-\text{C}=\text{C}-$ |
| 796 (796)                   | $\delta_{\text{s}}(\text{CH}_3)$                   |
| 722 (721)                   | $\gamma(\text{CH}_2)$                              |

<sup>a</sup> Symbols  $\nu$ ,  $\delta$ , and  $\gamma$  refer to stretching, in-plane deformation, and out-of-plane deformation, respectively.

<sup>b</sup> The numbers in bracket are from reference 1's IR database.

**Table S8 IR Peak Assignment for TCE**

| Wavenumber/cm <sup>-1</sup> | Assignment <sup>a</sup>     |
|-----------------------------|-----------------------------|
| 911 (910) <sup>b</sup>      | $\nu(\text{C-Cl})$ (strong) |
| 802 (802)                   | $\nu(\text{C-Cl})$          |
| 777 (778)                   | $\nu(\text{C-Cl})$          |
| 757 (767)                   | $\nu(\text{C-Cl})$          |

<sup>a</sup> Symbol  $\nu$  refers to stretching vibration.  
<sup>b</sup> The numbers in bracket are from reference 1's IR database.

**Table S9 PbTe QDs Stability Test Results of Sample QD-1**

| Sample #     | Sample Measurement                                   | Size (nm) | Size Distribution ( $\sigma$ ) |
|--------------|------------------------------------------------------|-----------|--------------------------------|
| QD-1 (QD-1a) | After synthesis                                      | 2.6       | 9.1%                           |
| QD-1b        | Stored as thin films on TEM copper grid for 130 days | 3.4       | 8.3%                           |

**Table S10 PbTe QDs Stability Test Results of Sample QD-2**

| Sample #     | Sample Measurement                                   | Size (nm) | Size Distribution ( $\sigma$ ) |
|--------------|------------------------------------------------------|-----------|--------------------------------|
| QD-2 (QD-2a) | After synthesis                                      | 3.3       | 7.3%                           |
| QD-2b        | Stored as thin films on TEM copper grid for 130 days | 3.4       | 6.9%                           |
| QD-2c        | Stored in TCE solution for 130 days                  | 3.3       | 5.9%                           |

**Table S11 PbTe QDs Stability Test Results of Sample QD-3**

| Sample #     | Sample Measurement                                   | Size (nm) | Size Distribution ( $\sigma$ ) |
|--------------|------------------------------------------------------|-----------|--------------------------------|
| QD-3 (QD-3a) | After synthesis                                      | 5.5       | 5.6%                           |
| QD-3b        | Stored as thin films on TEM copper grid for 130 days | 5.5       | 5.2%                           |
| QD-3c        | Stored in TCE solution for 130 days                  | 5.6       | 4.6%                           |

**Table S12** PbTe QDs Stability Test Results of Sample QD-4

| Sample #     | Sample Measurement                                   | Size (nm) | Size Distribution ( $\sigma$ ) |
|--------------|------------------------------------------------------|-----------|--------------------------------|
| QD-4 (QD-4a) | After synthesis                                      | 9.5       | 7.4%                           |
| QD-4b        | Stored as thin films on TEM copper grid for 130 days | 10.4      | 5.2%                           |
| QD-4c        | Stored in solid form for 130 days                    | varies    | uneven                         |

**Table S13** PbTe QDs Stability Test Results of Sample QD-5

| Sample #     | Sample Measurement                                   | Size (nm) | Size Distribution ( $\sigma$ ) |
|--------------|------------------------------------------------------|-----------|--------------------------------|
| QD-5 (QD-5a) | After synthesis                                      | 10.5      | 8.2%                           |
| QD-5b        | Stored as thin films on TEM copper grid for 130 days | 11.8      | 6.5%                           |
| QD-5c        | Stored in TCE solution for 130 days                  | 11.3      | 8.2%                           |

**Table S14** PbTe QDs Stability Test Results of Sample QD-6

| Sample #     | Sample Measurement                                   | Size (nm) | Size Distribution ( $\sigma$ ) |
|--------------|------------------------------------------------------|-----------|--------------------------------|
| QD-6 (QD-6a) | After synthesis                                      | 14.0      | 8.7%                           |
| Qd-6b        | Stored as thin films on TEM copper grid for 130 days | 14.9      | 9.4%                           |

Electronic Supplementary Material (ESI) for Journal of Materials Chemistry  
This journal is © The Royal Society of Chemistry 2012

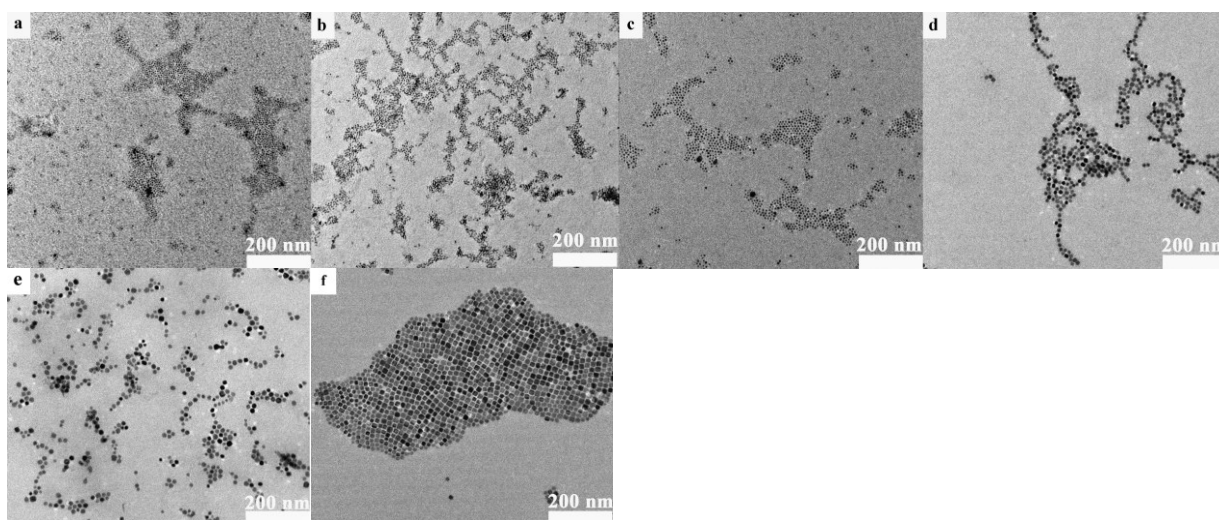

**Fig. S1** TEM images showing large areas of the hydrophobic PbTe QDs. Fig. S1a-S1f corresponding to PbTe QDs sample QD-1 to QD-6.

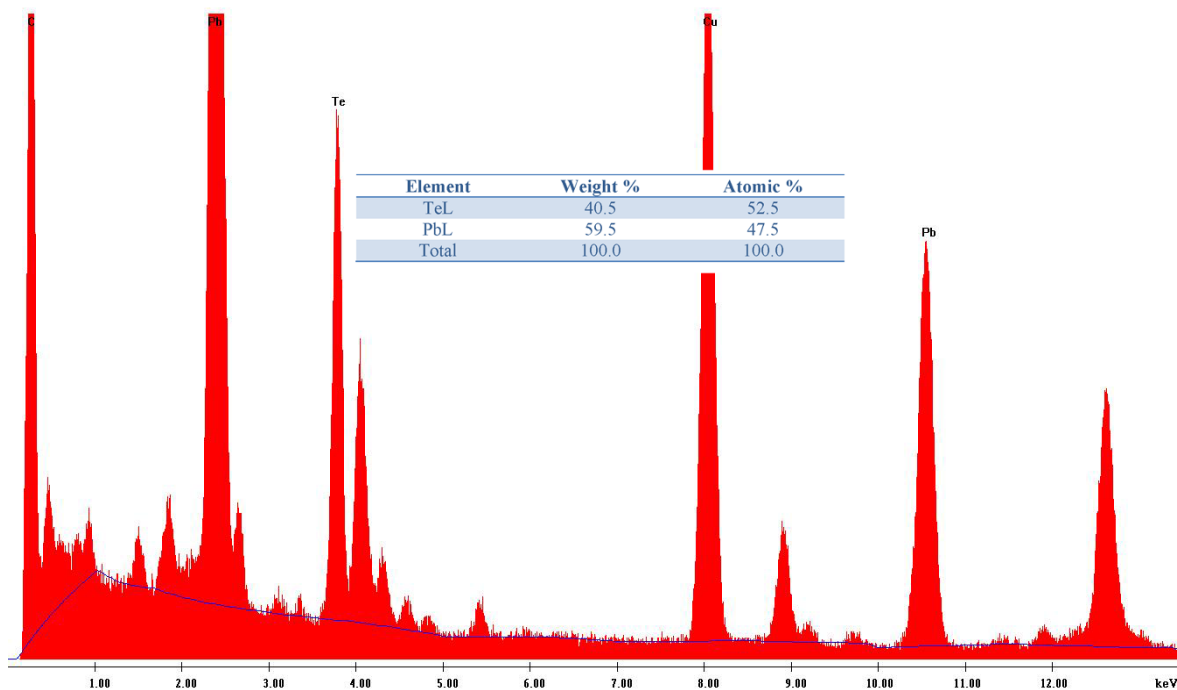

**Fig. S2** EDS Result of PbTe QDs sample QD-6.

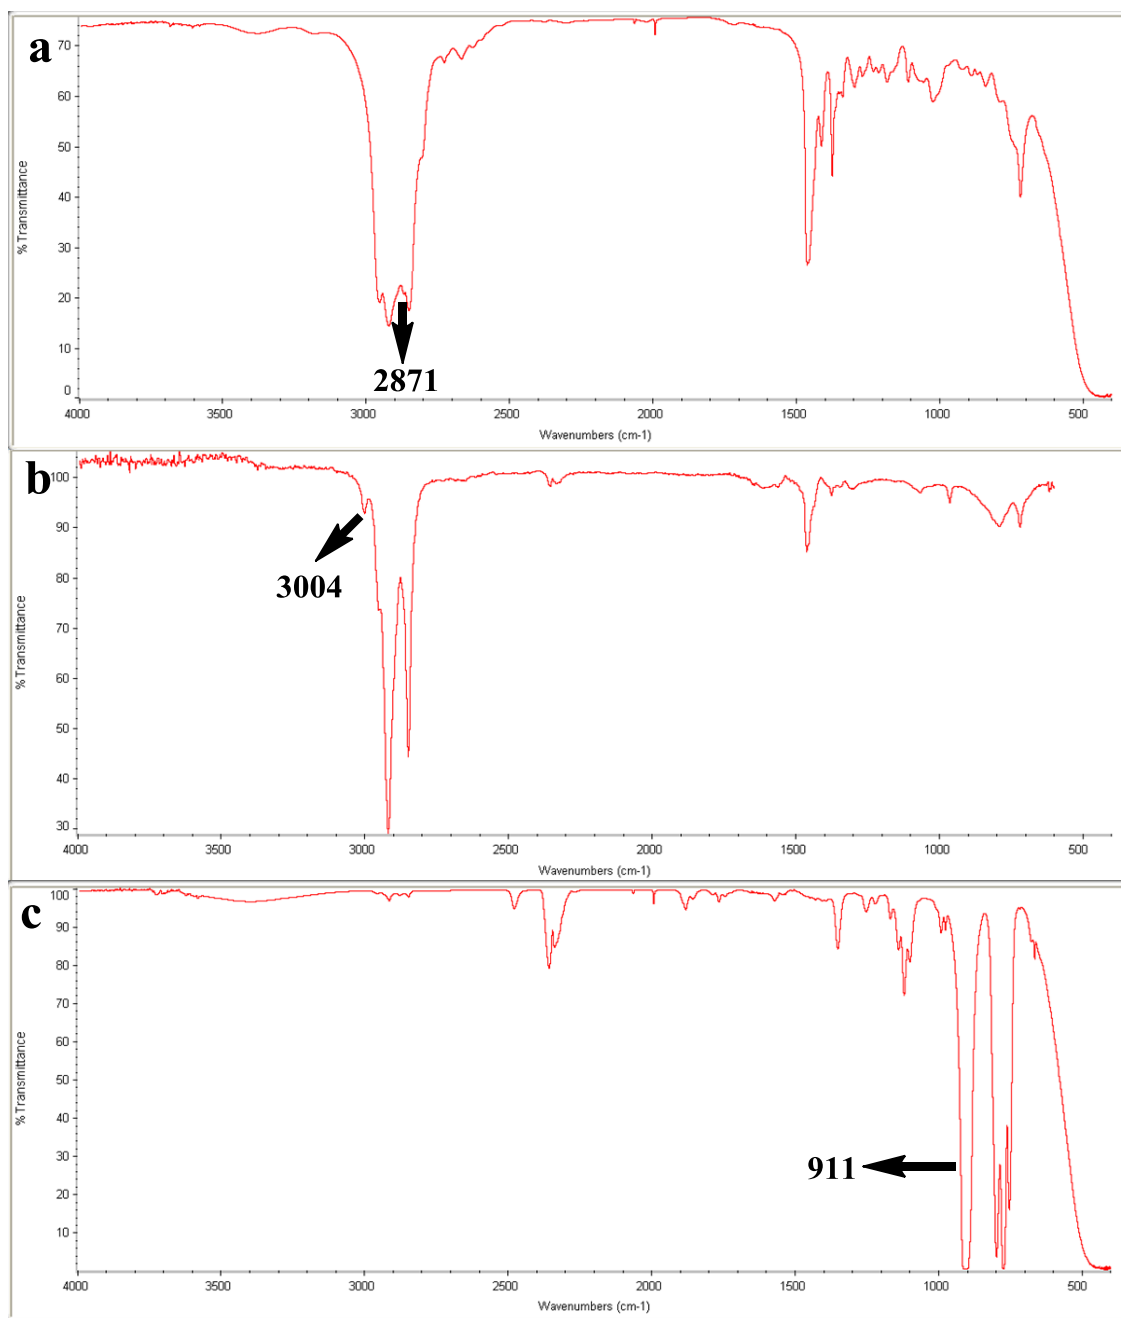

Fig. S3 IR spectra of TOP, OLA, and TCE. Fig. S3a is IR spectrum of TOP with typical  $\nu_s(\text{CH}_3)$  stretching at  $2871 \text{ cm}^{-1}$ ; Fig. S3b is IR spectrum of OLA with typical  $\nu(\text{CH})$  of  $-\text{CH}=\text{CH}-$  stretching at  $3004 \text{ cm}^{-1}$ ; Fig. S3c is IR spectrum of TCE with typical  $\nu(\text{C-Cl})$  stretching at  $911 \text{ cm}^{-1}$ . Refer to Table S6-S8 for the IR peak assignment for TOP, OLA, and TCE.

Electronic Supplementary Material (ESI) for Journal of Materials Chemistry  
This journal is © The Royal Society of Chemistry 2012

**a**

Archive directory: /export/home/ryan/vnmrsys/data  
Sample directory:

Pulse Sequence: s2pul  
Solvent: CDCl<sub>3</sub>  
Ambient temperature  
File: YP-Top-P31  
Mercury-300BB "vega300"

Relax. delay 1.000 sec  
Pulse 35.0 degrees  
Acq. time 1.600 sec  
Width 10010.0 Hz  
500 repetitions  
OBSERVE P31, 121.4667241 MHz  
DECOUPLE H1, 300.0623966 MHz  
Power 36 dB  
continuously on  
WALTZ-16 modulated  
DATA PROCESSING  
Line broadening 1.0 Hz  
FT size 32768  
Total time 22 min, 12 sec

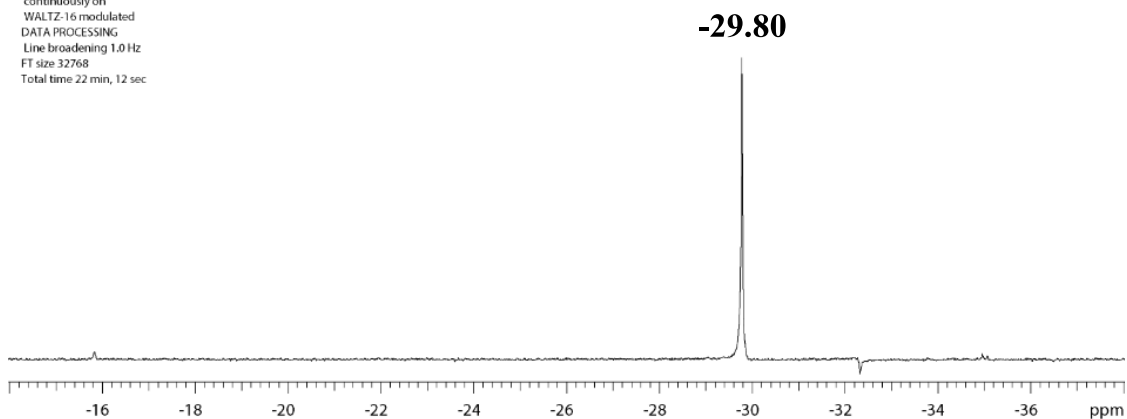

**b**

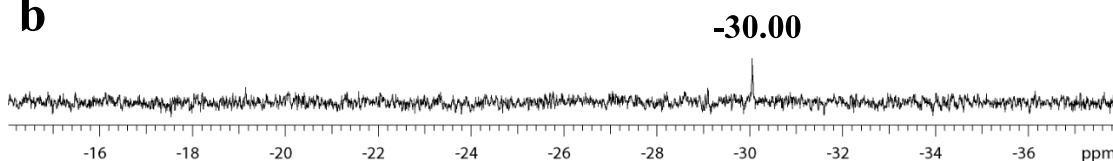

**c**

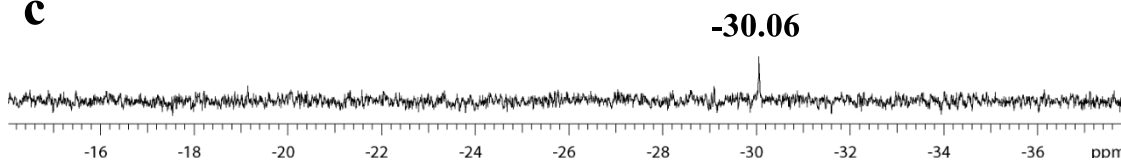

**d**

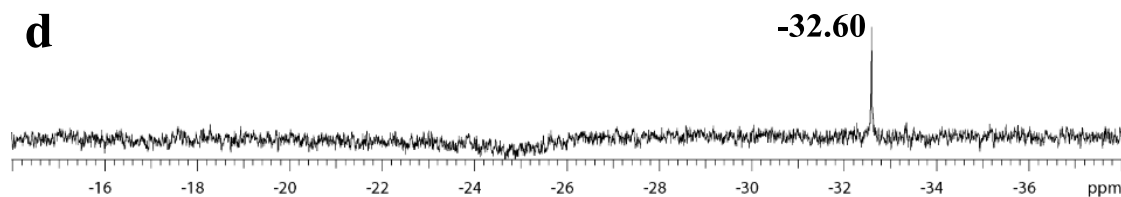

**e**

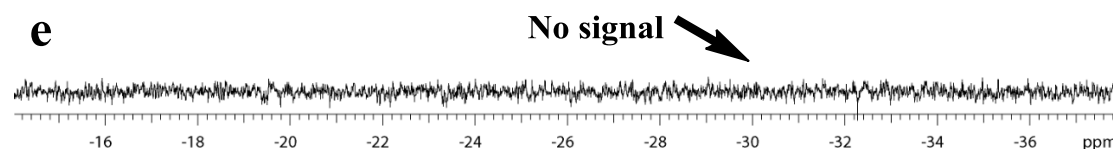

**Chemical Shift (ppm)**

Fig.S4 <sup>31</sup>P NMR spectra of TOP, TOP-OLA containing 9.4% TOP, TOP-OLA containing 1.6% TOP, after reaction mixture from PbTe QD synthesis, and purified PbTe QDs. The analyses were performed on a Varian Mercury-300 300 MHz spectrometer at room temperature with CDCl<sub>3</sub> as solvent. Fig.S4a is the <sup>31</sup>P spectrum of TOP,  $\delta = -29.80$  ppm; Fig. S4b is the <sup>31</sup>P spectrum of TOP-OLA containing 9.4% TOP,  $\delta = -30.00$  ppm. Fig.S4c is the <sup>31</sup>P spectrum of TOP-OLA containing 1.6% TOP,  $\delta = -30.06$  ppm. Fig.S4d

Electronic Supplementary Material (ESI) for Journal of Materials Chemistry  
This journal is © The Royal Society of Chemistry 2012

is the  $^{31}\text{P}$  spectrum of the reaction mixture,  $\delta = -32.60$  ppm. Fig. S4e is the  $^{31}\text{P}$  spectrum of the purified PbTe QDs with no  $^{31}\text{P}$  signal detected. It demonstrates that TOP is not attached to the surface of PbTe QDs and TOP is not a capping ligand of PbTe QDs.

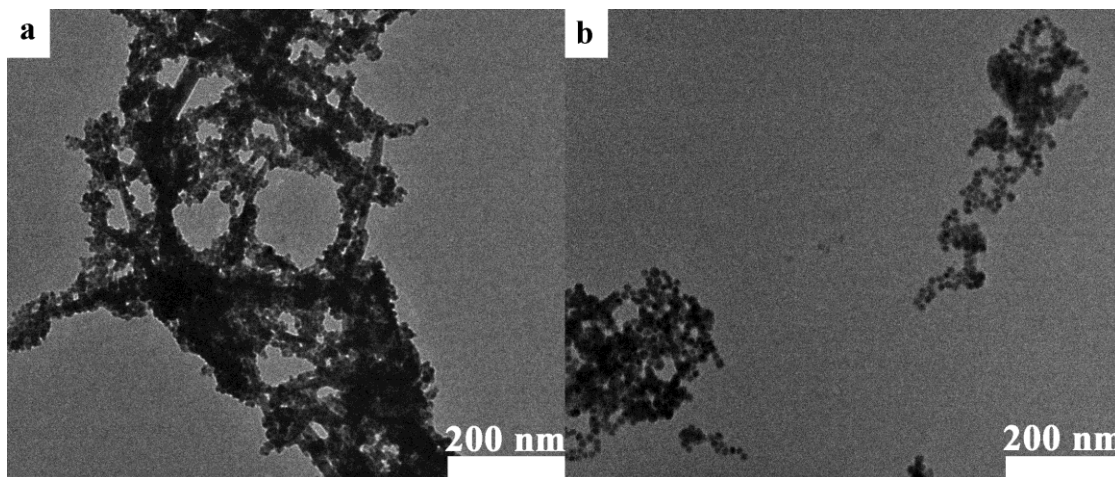

**Fig. S5** TEM images showing large areas of the hydrophilic PbTe QDs samples. Fig. S5a-S5b corresponding to PbTe QDs sample QD-8 and QD-9.

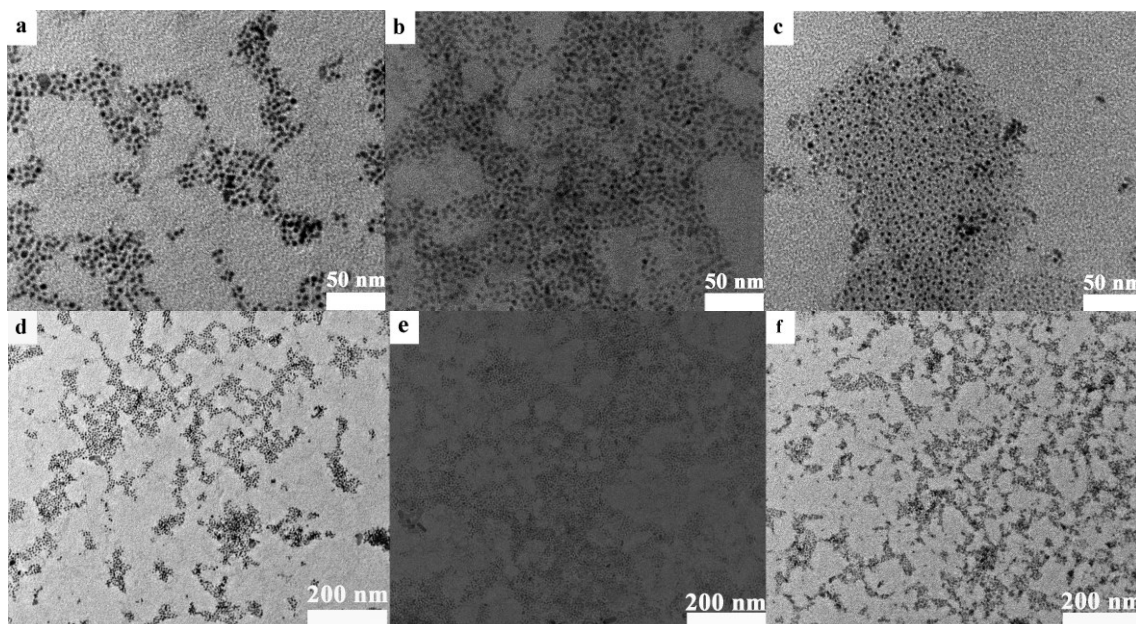

**Fig. S6** The TEM images showing both small (50 nm scale bar) and large (200 nm scale bar) areas of the PbTe QDs stability test of sample QD-2. Fig. S6a and Fig. S6d, QD-2a of 3.3 nm with  $\sigma = 7.3\%$ : samples measured after synthesis; Fig. S6b and Fig. S6e, QD-2b of 3.4 nm with  $\sigma = 6.9\%$ : samples stored as thin film on TEM copper grid and measured after 130 days; Fig. S6c and Fig. S6f, QD-2c of 3.3 nm with  $\sigma = 5.9\%$ : samples stored in TCE and measured after 130 days. There are no changes for QD-2. The PbTe QDs are air-stable as thin film and relatively air-stable (shape variations) in TCE.



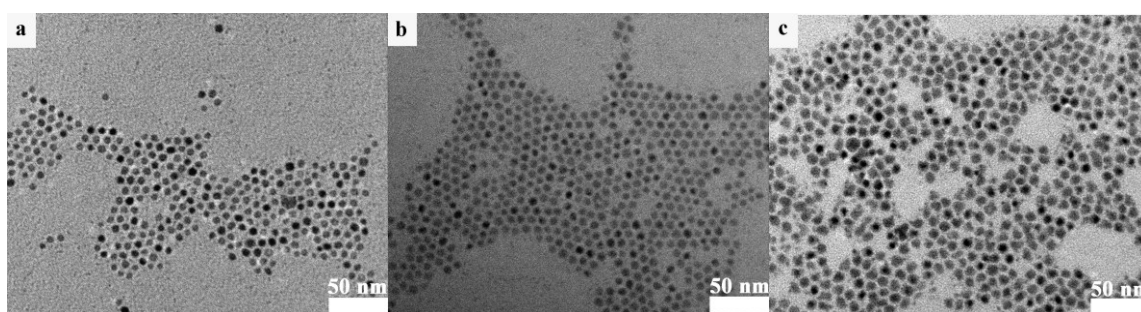

**Fig. S7** The TEM images of the PbTe QDs stability test of sample QD-3 (Fig. S7a-7c). Fig. S7a, QD-3a of 5.5 nm with  $\sigma = 5.6\%$ : samples measured after synthesis; Fig. S7b, QD-3b of 5.5 nm with  $\sigma = 5.2\%$ : samples stored as thin films on TEM copper grid and measured after 130 days; Fig. S7c, QD-3c of 5.6 nm with  $\sigma = 4.6\%$ : samples stored in TCE and measured after 130 days. The PbTe QDs are air-stable as thin film even tested from different batches of synthesis.

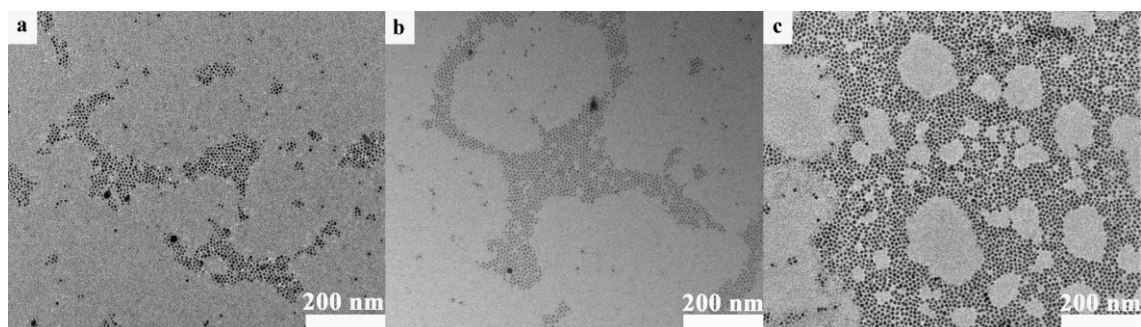

**Fig. S8** The TEM images showing large area of the PbTe QDs stability test of sample QD-3. Fig. S8a, QD-3a of 5.5 nm with  $\sigma = 5.6\%$ : samples measured after synthesis; Fig. S8b, QD-8b of 5.5 nm with  $\sigma = 5.2\%$ : samples stored as thin films on TEM copper grid and measured after 130 days; Fig. S8c, QD-3c of 5.6 nm with  $\sigma = 4.6\%$ : samples stored in TCE and measured after 130 days. There are also no changes for QD-3. The PbTe QDs are air-stable as thin film. It is also relatively air-stable (shape variations) in TCE.

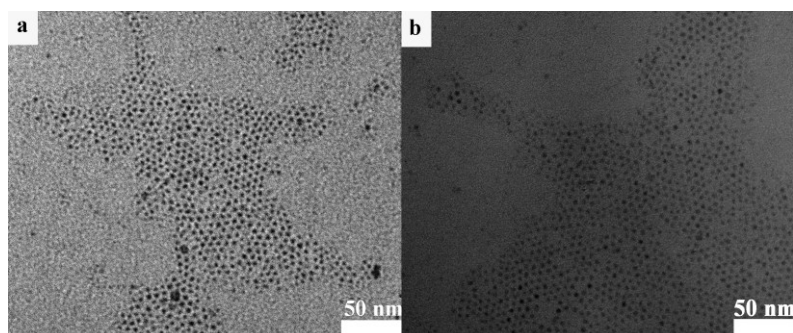

**Fig. S9** The TEM images of the PbTe QDs stability test of sample QD-1. Fig. S9a, QD-1a of 2.6 nm with  $\sigma = 9.1\%$ : samples measured after synthesis; Fig. S9b, QD-1b of 3.4 nm with  $\sigma = 8.3\%$ : samples stored as thin films on TEM copper grid and measured after 130 days. The bigger size of 3.4 nm measured on TEM film is due to its  $\sigma > 9.1\%$

and experimental measurement error.

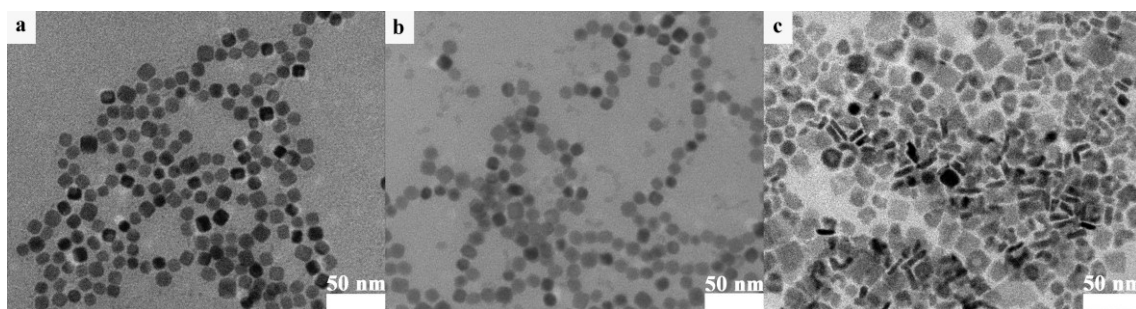

**Fig. S10** The TEM images of the PbTe QDs stability test of sample QD-4. Fig. S10a, QD-4a of 9.5 nm with  $\sigma = 7.4\%$ : samples measured after synthesis; Fig. S10b, QD-4b of 10.4 nm with  $\sigma = 7.5\%$ : samples stored as thin films on TEM copper grid and measured after 130 days; Fig. S8c, QD-10c (decomposing or decomposed): stored in solid form and measured after 130 days. The PbTe QDs are air-stable as thin film. However, it is unstable in solid form.

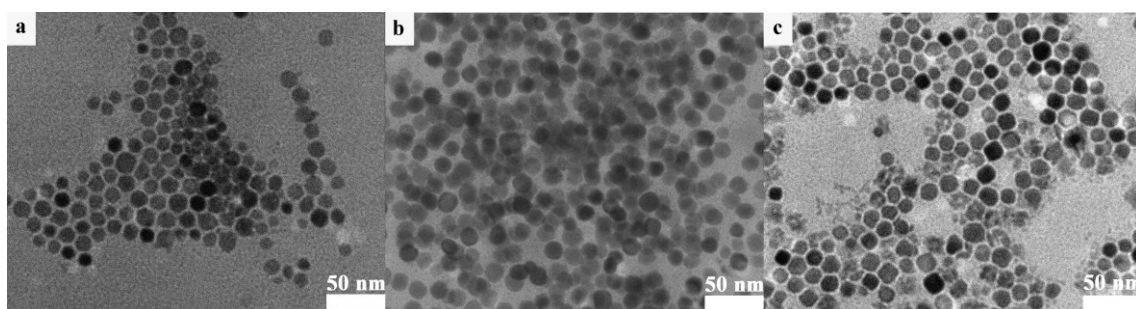

**Fig. S11** The TEM images of the PbTe QDs stability test of sample QD-5. Fig. S11a, QD-5a of 10.5 nm with  $\sigma = 8.2\%$ : samples measured after synthesis; Fig. S11b, QD-5b of 11.8 nm with  $\sigma = 6.5\%$ : samples stored as thin films on TEM copper grid and measured after 130 days; Fig. S11c, QD-5c of 11.3 nm with  $\sigma = 8.2\%$ : samples stored in TCE and measured after 130 days. The bigger size of 11.8 nm measured on TEM film is due to its  $\sigma > 8.2\%$  but within experimental measurement error. Overall, the samples are air-stable as thin film. The samples are relatively air-stable (shape variations) in TCE.

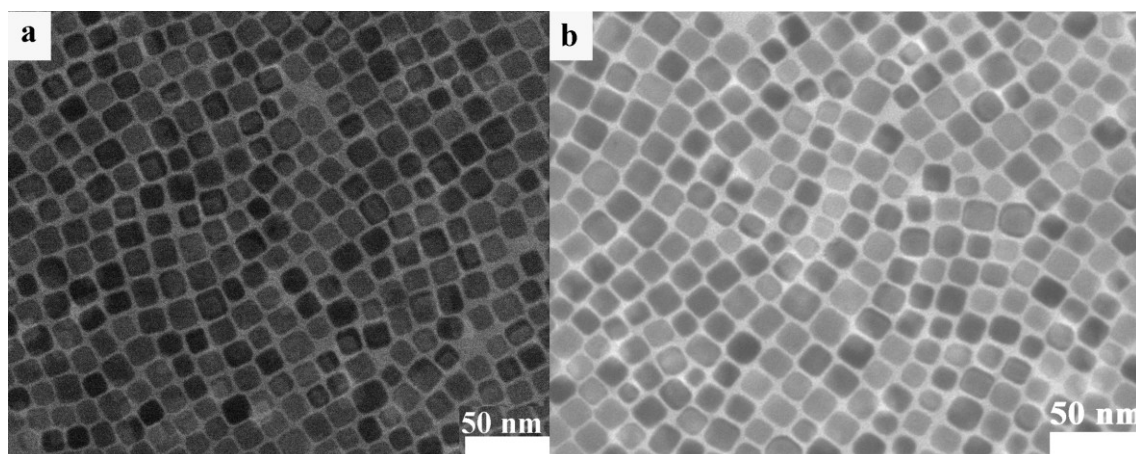

**Fig. S12** The TEM images of the PbTe QDs stability test of sample QD-6. Fig. S12a, QD-6a of 14.0 nm with  $\sigma = 8.7\%$ : samples measured after synthesis; Fig. S12b, QD-6b of 14.9 nm with  $\sigma = 9.4\%$ : samples stored as thin films on TEM copper grid and measured after 130 days. The apparent enlargement of the sample in Fig. S12b is due to the moisture adsorption on the surface of PbTe QDs making the spacing distance between PbTe nanocrystals bigger. The samples are air-stable as thin film.

1. ASIT, in *Integrated Spectral Database System of Organic Compounds SDBD (the National Institute of Advanced Industrial Science and Technology, Japan)*.
2. P. Torkington, *Transactions of the Faraday Society*, 1949, **45**, 445-447.
3. A. G. Young, N. Al-Salim, D. P. Green and A. J. McQuillan, *Langmuir*, 2008, **24**, 3841-3849.
